# Supplementary material for: Siliceous tin phosphates as effective bifunctional catalysts for selective conversion of dihydroxyacetone to lactic acid
Source: Royal Society of Chemistry journal article supplement (doi:10.1039/c6cy00553e), 2016-01-01

## Supporting Information

### Catalysis Science & Technology

# Siliceous tin phosphates as effective bifunctional catalysts for selective conversion of dihydroxyacetone to lactic acid

Xincheng Wang,<sup>a</sup> Fengbing Liang,<sup>b</sup> Chongpin Huang,<sup>\*a</sup> Yingxia Li,<sup>a</sup> and Biaohua Chen<sup>a</sup>

<sup>a</sup> State Key Laboratory of Chemical Resource Engineering, Beijing University of Chemical Technology, Beijing 100029, China. Fax: 86 10 6441 9619; Tel: 86 10 6441 2054;

E-mail: huangcp@mail.buct.edu.cn

<sup>b</sup> CAS Key Laboratory of Biobased Materials, Qingdao Institute of Bioenergy and Bioprocess Technology, Chinese Academy of Sciences, Qingdao 266101, China.

## Table of Contents

### Tables:

**Table S1.** Physicochemical properties of the calcined siliceous tin phosphates.

**Table S2.** Conversion of DHA and product yields over different calcined tin phosphates in water.

**Table S3.** Conversion of DHA and product yields over different tin phosphates in water.

**Table S4.** Characterization of recycled as-synthesized Si<sub>6</sub>-Sn(IV)P and Sn(IV)P catalyst by adsorption, ICP, and TGA analysis.

### Figures:

**Fig. S1.** HPLC chromatogram of the aqueous phase obtained from the hydrothermal treatment of GLA (conditions: 0.3125 M GLA, 80 mg Si<sub>6</sub>-Sn(IV)P, 140 °C, 15 min).

**Fig. S2.** Wide-angle XRD profile of the Si<sub>6</sub>-Sn(IV)P catalyst.

**Fig. S3.** TEM images of the as-synthesized (left) and calcined (right) Si<sub>6</sub>-Sn(IV)P.

**Fig. S4.** UV-vis DRS spectra of the as-synthesized and calcined Si<sub>6</sub>-Sn(IV)P. The recycled line is the spectrum of the as-synthesized sample after the 3rd reuse.

**Fig. S5.** NH<sub>3</sub>-TPD curves of Si<sub>6</sub>-Sn(IV)P. The signals are scaled to weight.

**Fig. S6.** Deconvoluted XPS spectra of O 1s for as-synthesized (a) and calcined (b) Si<sub>6</sub>-Sn(IV)P samples.

**Fig. S7.** The results of DHA conversion after 5 h (Conditions: 0.3125 M DHA, 80 mg Catalyst, 140 °C, 6 h). Sn-Beta and Sn(IV)P were used as references.

**Fig. S8.** TGA analysis of uncalcined silica modified tin phosphates with varying TEOS amounts.

**Table S1** Physicochemical properties of the calcined siliceous tin phosphates.

| Entry | Catalyst                                | Sn source                            | Specific                                          | Sn content <sup>a</sup> | Si content <sup>a</sup> | Total acid sites <sup>b</sup> |
|-------|-----------------------------------------|--------------------------------------|---------------------------------------------------|-------------------------|-------------------------|-------------------------------|
|       |                                         |                                      | surface area<br>(m <sup>2</sup> g <sup>-1</sup> ) | wt%                     | wt%                     | (mmol g <sup>-1</sup> )       |
| 1     | Sn(IV)P                                 | SnCl <sub>4</sub> ·5H <sub>2</sub> O | 168                                               | 47.2                    | -                       | 0.67                          |
| 2     | Si <sub>6</sub> -Sn(IV)P-o              | SnO <sub>2</sub>                     | 171                                               | 60.8                    | 9.3                     | 0.17                          |
| 3     | Si <sub>6</sub> -Sn(II)P                | SnCl <sub>2</sub> ·2H <sub>2</sub> O | 135                                               | 22.3                    | 11.4                    | 0.11                          |
| 4     | Si <sub>2</sub> -Sn(IV)P                | SnCl <sub>4</sub> ·5H <sub>2</sub> O | 176                                               | 44.5                    | 5.1                     | 0.55                          |
| 5     | Si <sub>4</sub> -Sn(IV)P                | SnCl <sub>4</sub> ·5H <sub>2</sub> O | 208                                               | 39.2                    | 10.2                    | 0.51                          |
| 6     | Si <sub>6</sub> -Sn(IV)P                | SnCl <sub>4</sub> ·5H <sub>2</sub> O | 192                                               | 34.6                    | 13.2                    | 0.46                          |
| 7     | Si <sub>8</sub> -Sn(IV)P                | SnCl <sub>4</sub> ·5H <sub>2</sub> O | 157                                               | 31.7                    | 16.5                    | 0.41                          |
| 8     | Si <sub>10</sub> -Sn(IV)P               | SnCl <sub>4</sub> ·5H <sub>2</sub> O | 173                                               | 28.4                    | 18.8                    | 0.35                          |
| 9     | Si <sub>6</sub> -Sn(IV)P-g <sup>c</sup> | SnCl <sub>4</sub> ·5H <sub>2</sub> O | 139                                               | 30.1                    | 14.6                    | 0.42                          |

<sup>a</sup> Determined by ICP analysis, <sup>b</sup> Determined by ammonia TPD, <sup>c</sup> The silicon source is silica gel.

**Table S2.** Conversion of DHA and product yields over different calcined tin phosphates in water.<sup>a</sup>

| Entry | Catalyst                  | Conv. (%) | PA (%) | LA (%) |
|-------|---------------------------|-----------|--------|--------|
| 1     | Si <sub>2</sub> -Sn(IV)P  | 45.7      | 39.7   | 5.9    |
| 2     | Si <sub>4</sub> -Sn(IV)P  | 39.1      | 31.4   | 4.3    |
| 3     | Si <sub>6</sub> -Sn(IV)P  | 36.4      | 30.6   | 3.4    |
| 4     | Si <sub>8</sub> -Sn(IV)P  | 30.6      | 25.8   | 2.5    |
| 5     | Si <sub>10</sub> -Sn(IV)P | 26.3      | 20.5   | 3.4    |

<sup>a</sup> Reaction conditions: 0.3125 M DHA, 80 mg Catalysts, 140 °C, 15 min.

**Table S3.** Conversion of DHA and product yields over as-synthesized tin phosphates in water<sup>a</sup>

| Entry | Catalyst                             | Conv. (%) | PA (%) | LA (%) |
|-------|--------------------------------------|-----------|--------|--------|
| 1     | Blank                                | 1.01      | <0.5   | <0.5   |
| 2     | H <sub>3</sub> PO <sub>4</sub>       | 23.1      | 18.6   | 0.8    |
| 3     | SnCl <sub>4</sub> ·5H <sub>2</sub> O | 28.3      | 20.7   | 4.1    |
| 4     | SnCl <sub>2</sub> ·2H <sub>2</sub> O | 27.3      | 23.6   | 5.4    |
| 5     | Si <sub>6</sub> -Sn(IV)P-o           | 3.3       | 1.8    | <0.5   |
| 6     | Si <sub>6</sub> -Sn(II)P             | 2.5       | 1.4    | <0.5   |
| 7     | Si <sub>2</sub> -Sn(IV)P             | 70.8      | 59.2   | 9.4    |
| 8     | Si <sub>4</sub> -Sn(IV)P             | 72.7      | 58.3   | 12.5   |
| 9     | Si <sub>6</sub> -Sn(IV)P             | 72.8      | 58.6   | 12.6   |
| 10    | Si <sub>8</sub> -Sn(IV)P             | 75.9      | 56.7   | 11.2   |
| 11    | Si <sub>10</sub> -Sn(IV)P            | 57.4      | 45.0   | 10.1   |
| 12    | Sn-Beta                              | 27.5      | 5.1    | 14.3   |

<sup>a</sup> Reaction conditions: 0.3125 M DHA, 80 mg Catalysts, 140 °C, 15 min.

**Table S4.** Characterization of recycled as-synthesized Si<sub>6</sub>-Sn(IV)P and Sn(IV)P catalyst by adsorption, ICP, and TGA analysis.

| Catalyst                 | Run   | Specific surface area (m <sup>2</sup> g <sup>-1</sup> ) | Total acid sites (mmol g <sup>-1</sup> ) | Relative Sn content (%) | Relative P content (%) | Weight loss (%) | Carbon deposition (%) |
|--------------------------|-------|---------------------------------------------------------|------------------------------------------|-------------------------|------------------------|-----------------|-----------------------|
| Si <sub>6</sub> -Sn(IV)P | Fresh | 137                                                     | 0.77                                     | 100                     | 100                    | 9.1             | -                     |
|                          | 1     | 135                                                     | 0.73                                     | 96.3                    | 94.6                   | 9.35            | 0.25                  |
|                          | 2     | 141                                                     | 0.65                                     | 95.7                    | 93.1                   | 9.41            | 0.31                  |
|                          | 3     | 129                                                     | 0.63                                     | 95.2                    | 92.5                   | 9.59            | 0.49                  |
| Sn(IV)P                  | Fresh | 146                                                     | 0.72                                     | 100                     | 100                    | 16.2            | -                     |
|                          | 1     | 140                                                     | 0.65                                     | 94.5                    | 93.7                   | 16.91           | 0.71                  |
|                          | 2     | 137                                                     | 0.59                                     | 93.6                    | 92.5                   | 17.13           | 0.93                  |
|                          | 3     | 131                                                     | 0.53                                     | 92.2                    | 92.0                   | 17.45           | 1.25                  |

Fig. S1.

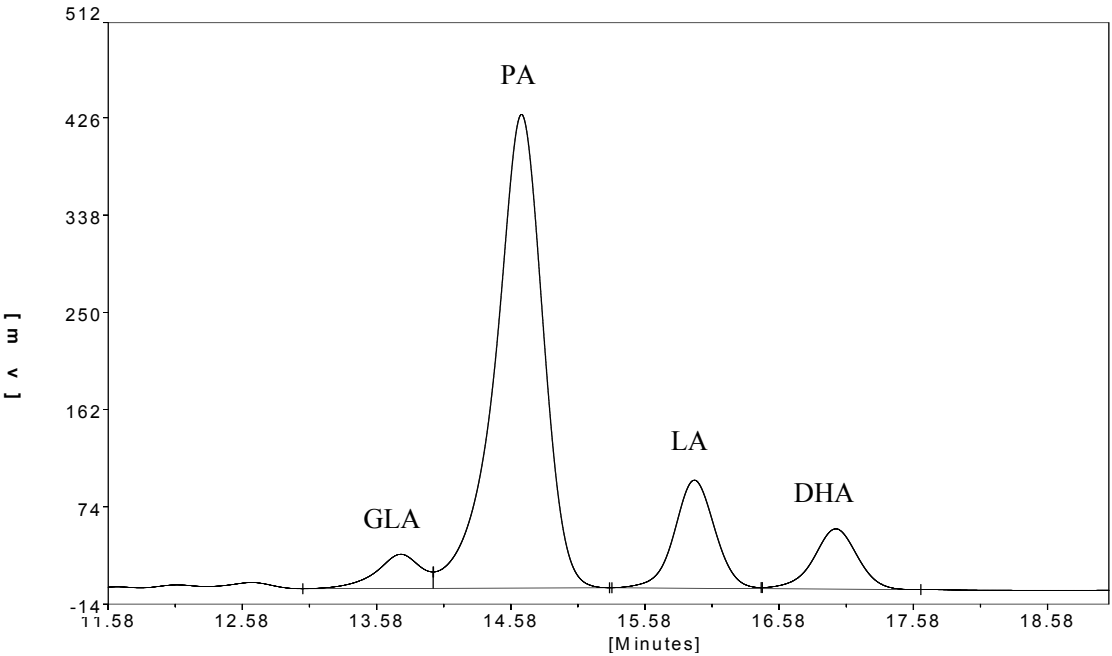

Fig. S2.

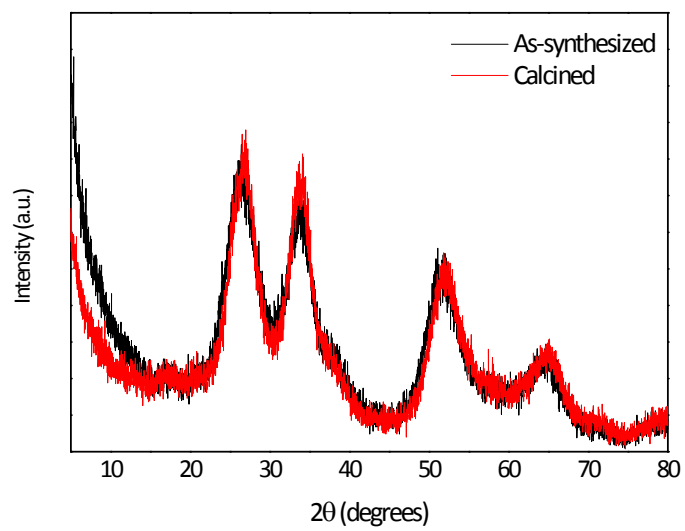

Fig. S3.

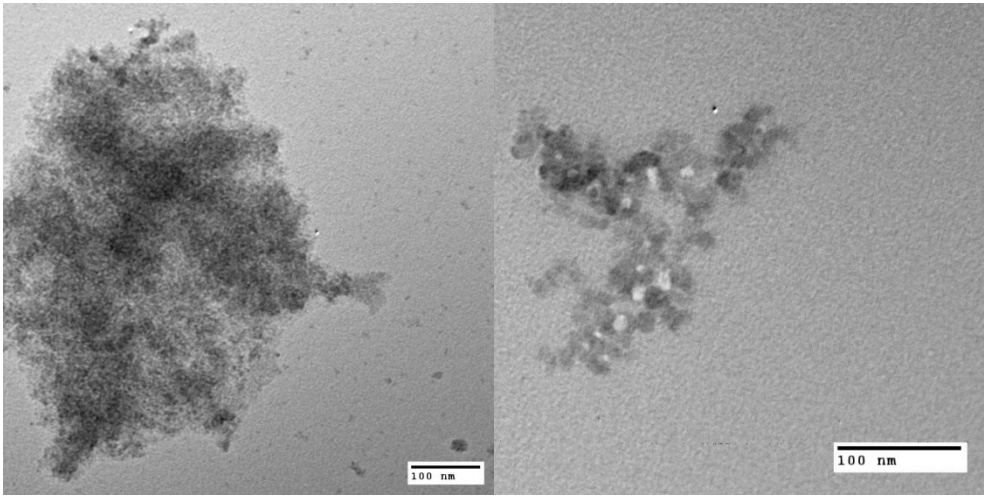



Fig. S4.

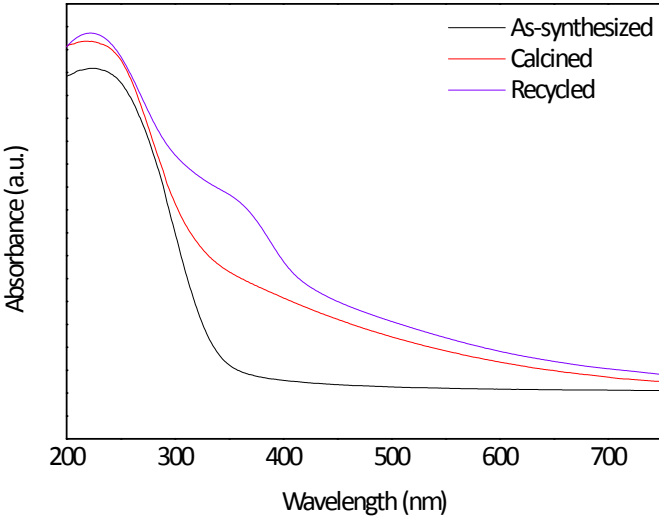

Fig. S5.

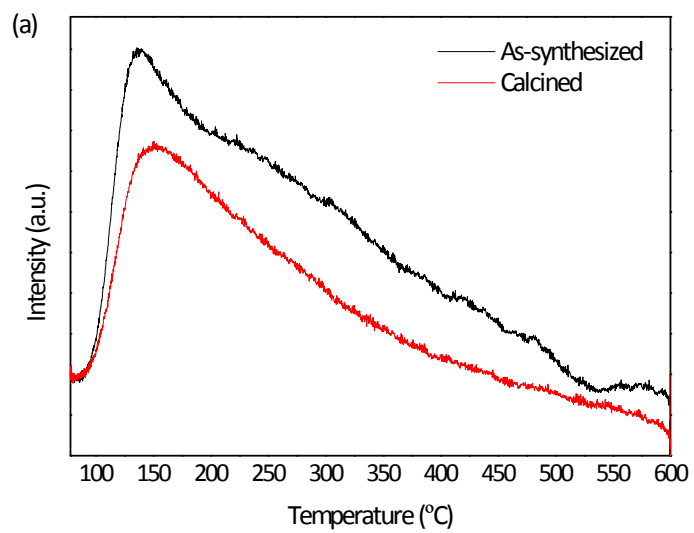

Fig. S6.

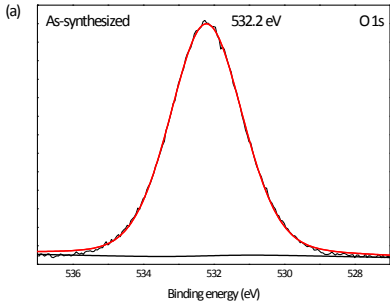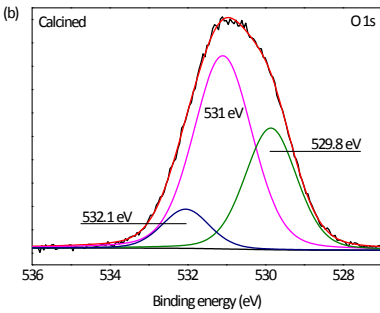

Fig. S7.

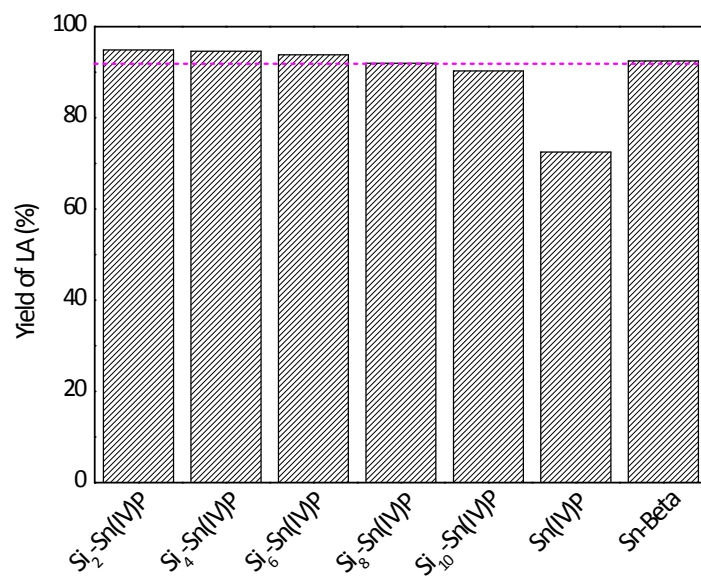

Fig. S8.

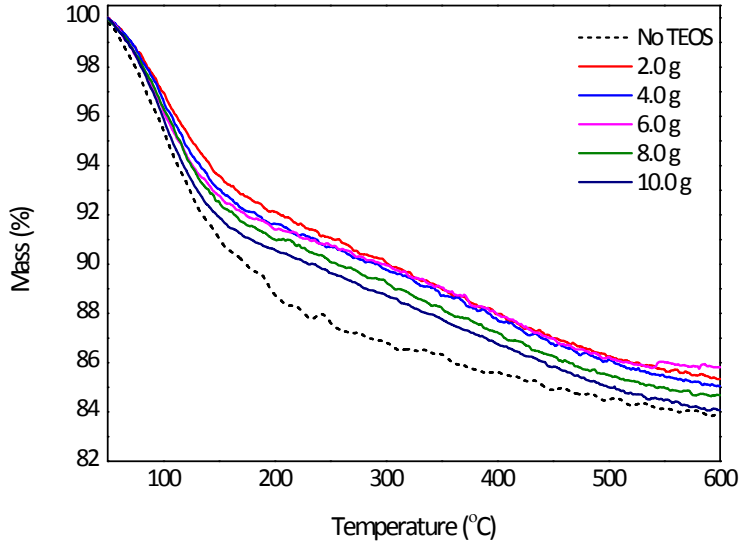

Supplement: c6cy00553e1.pdf [file c6cy00553e1.pdf]
